# Supplementary material
Source: PubMed Central journal article supplement (PMC8513797)

**Figure S1**

**A**

**Hsp90AA1**

Overall Survival

$p=0.0024$

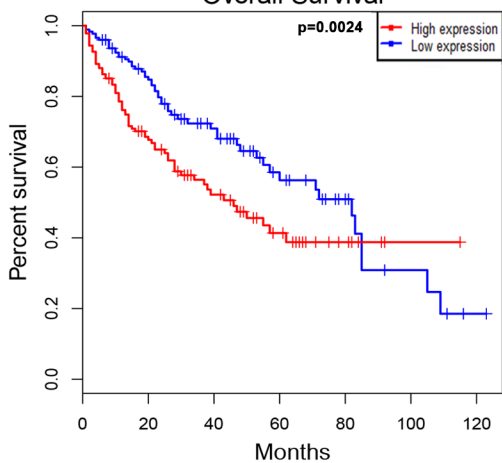

**TCGA**

**Hsp90AB1**

Overall Survival

$p=0.05$

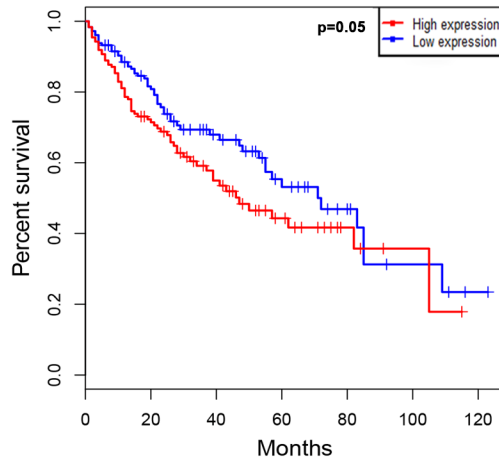

**PRKDC**

Overall Survival

$p=0.0303$

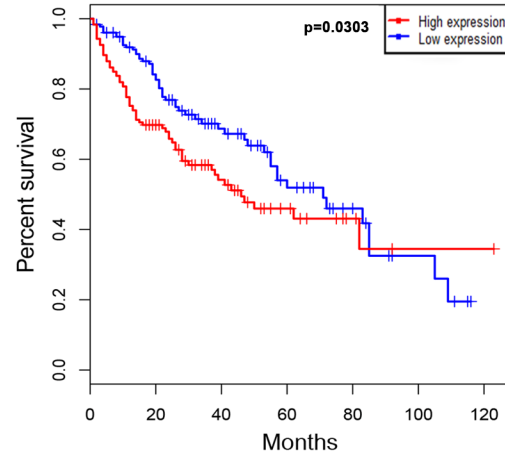

**B**

**Hsp90AA1**

Overall Survival

$p=0.00555$

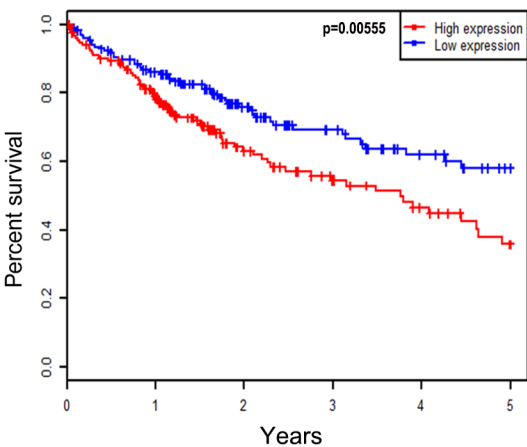

**HCCDB**

**Hsp90AB1**

Overall Survival

$p=0.0145$

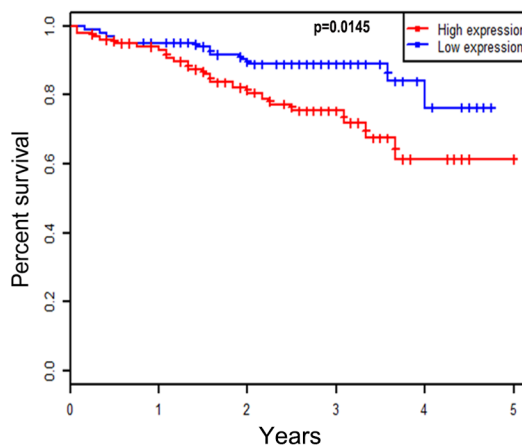

**PRKDC**

Overall Survival

$p=0.0303$

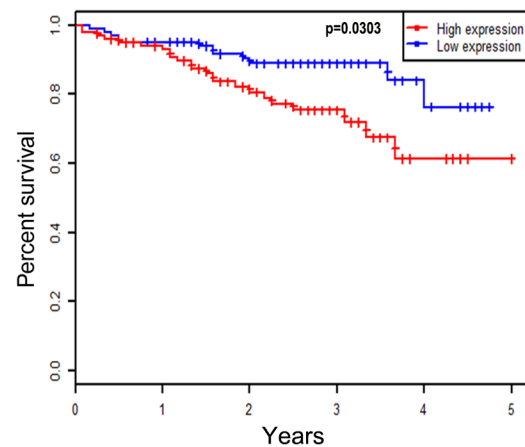

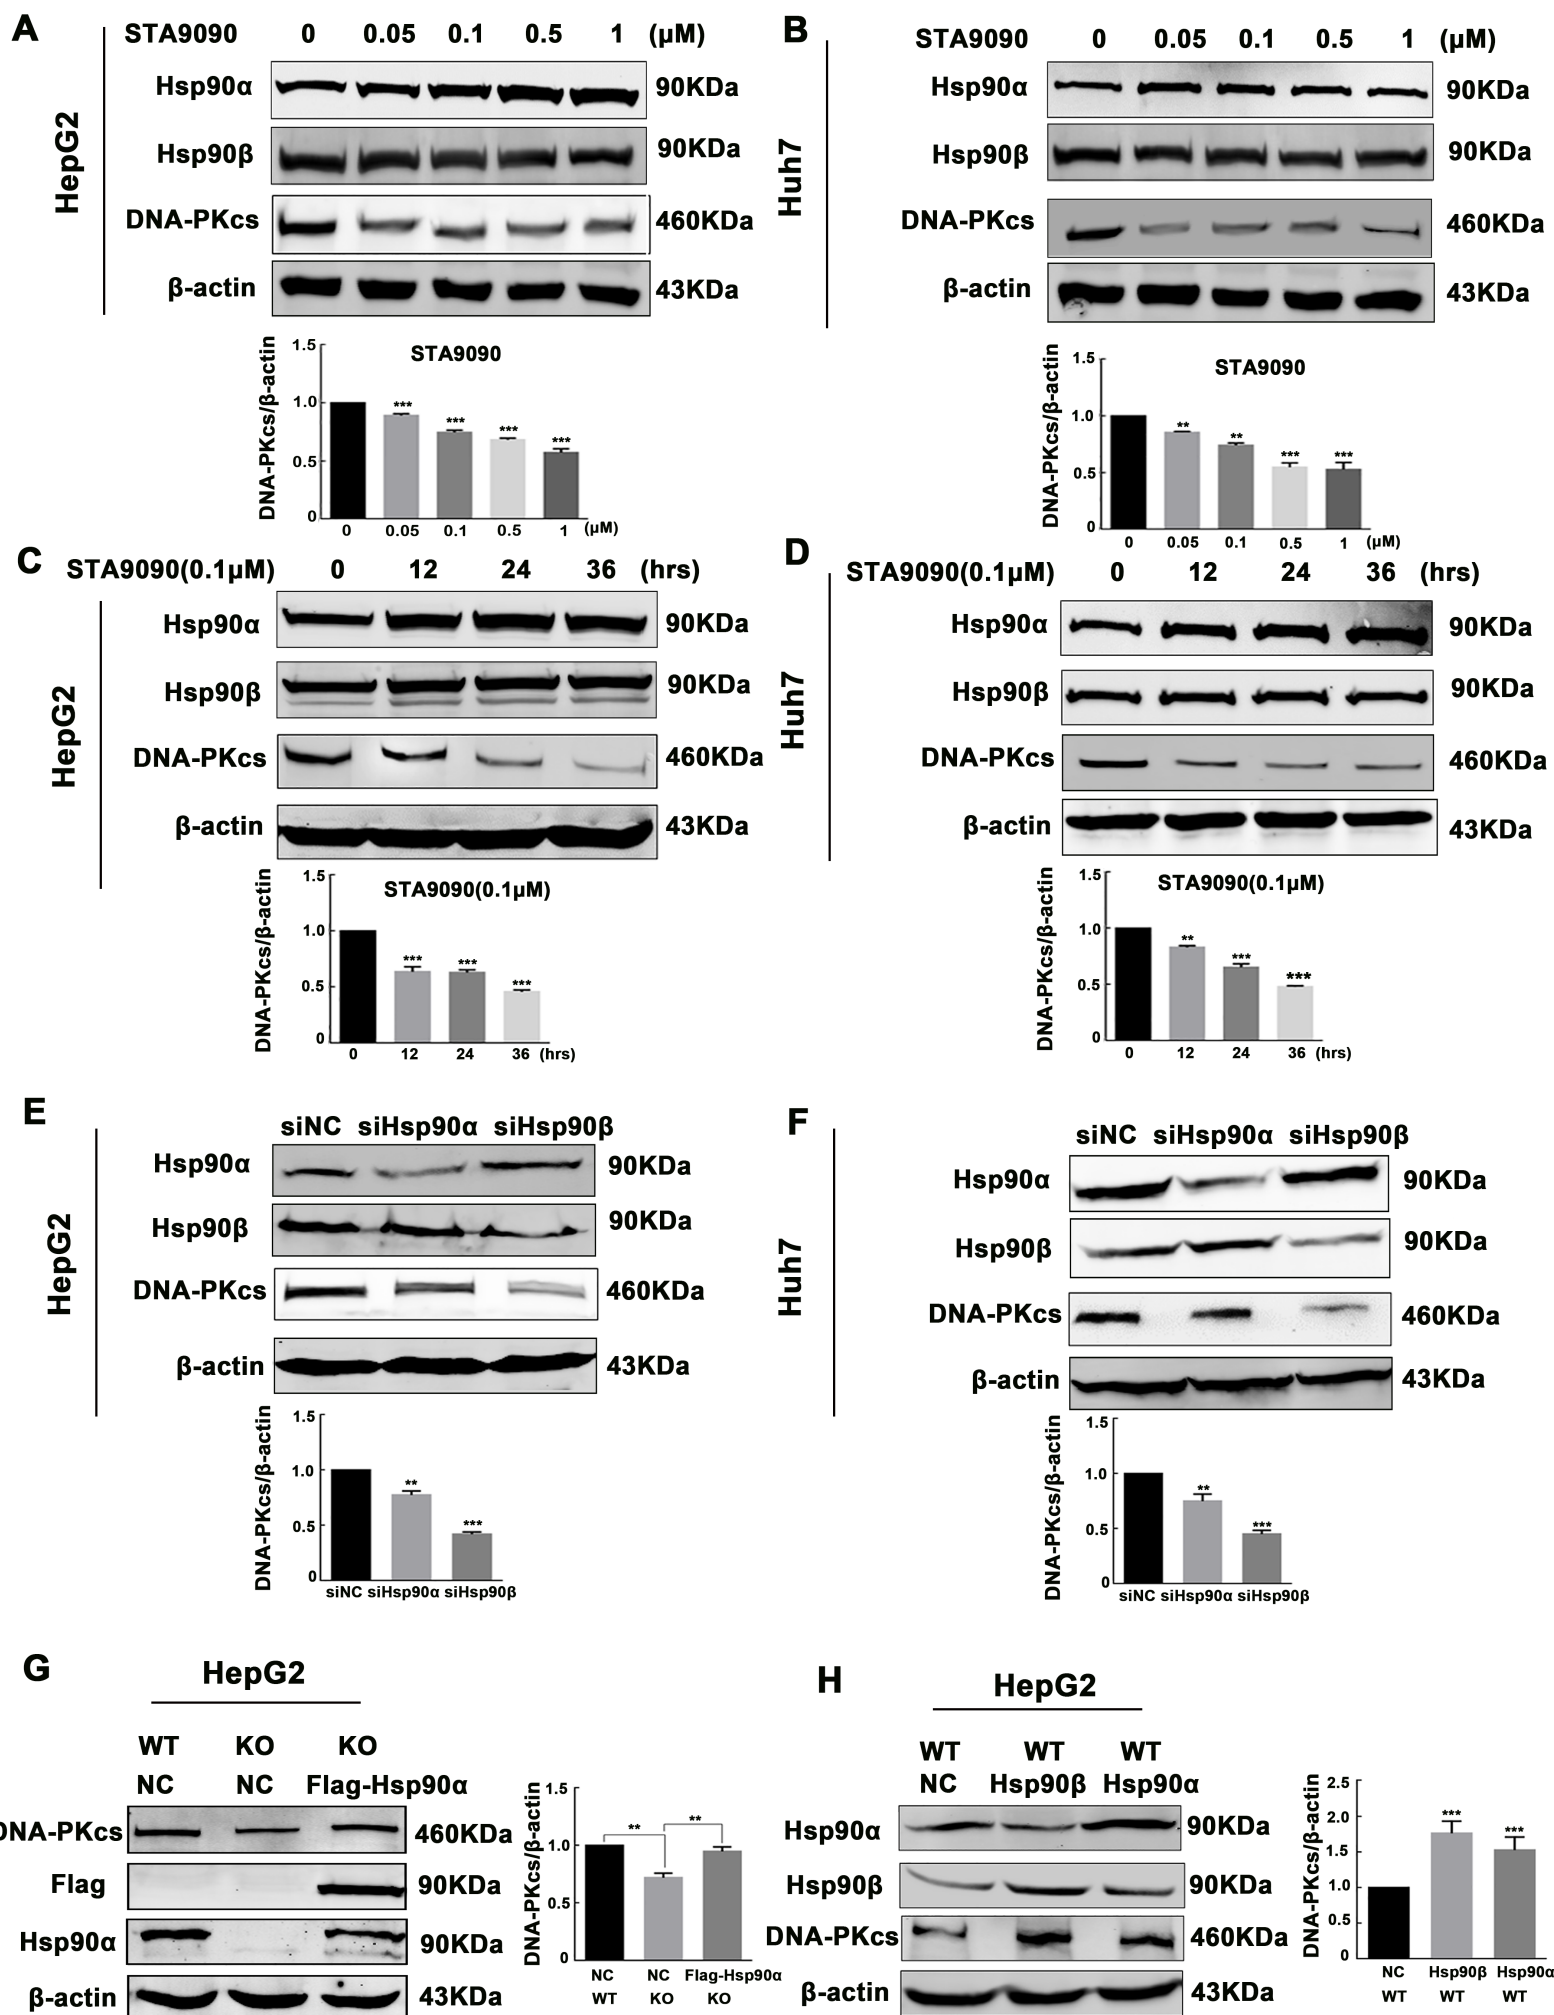

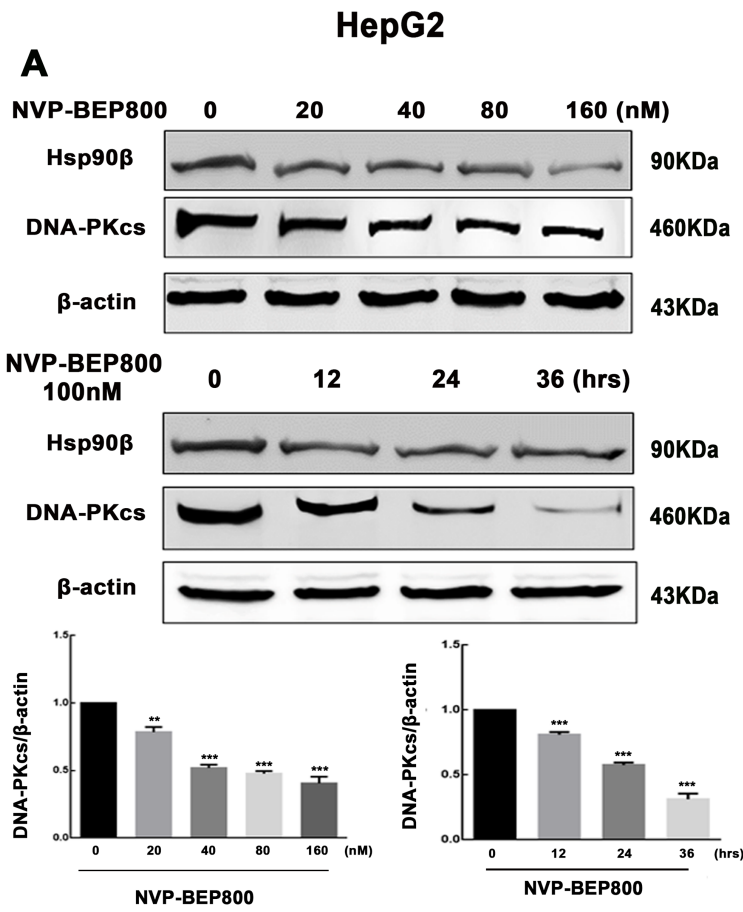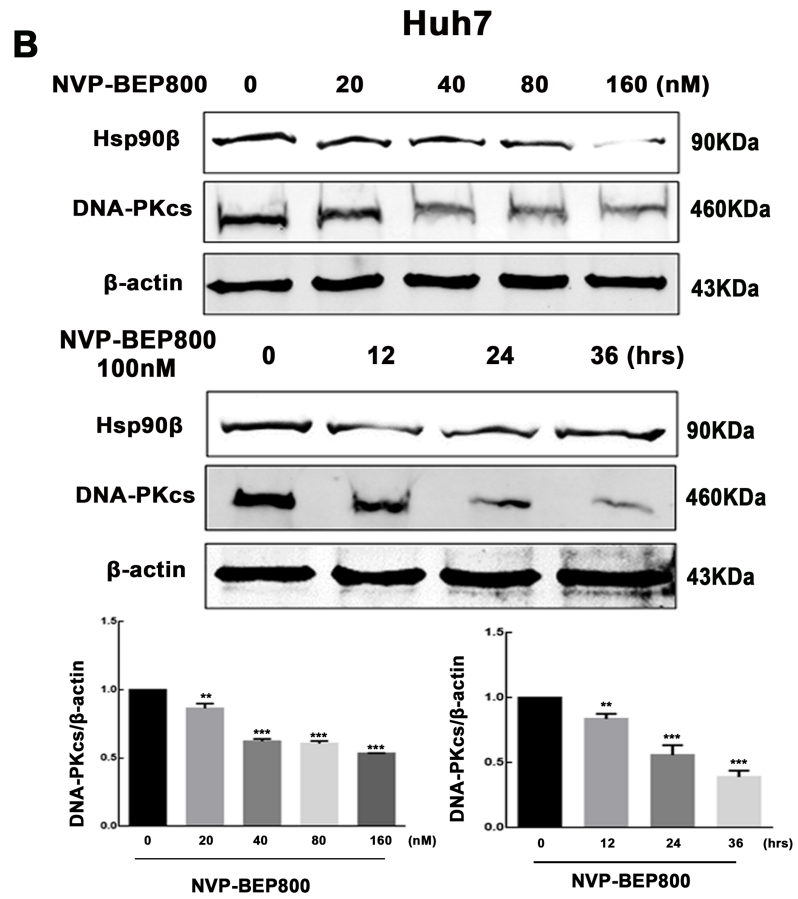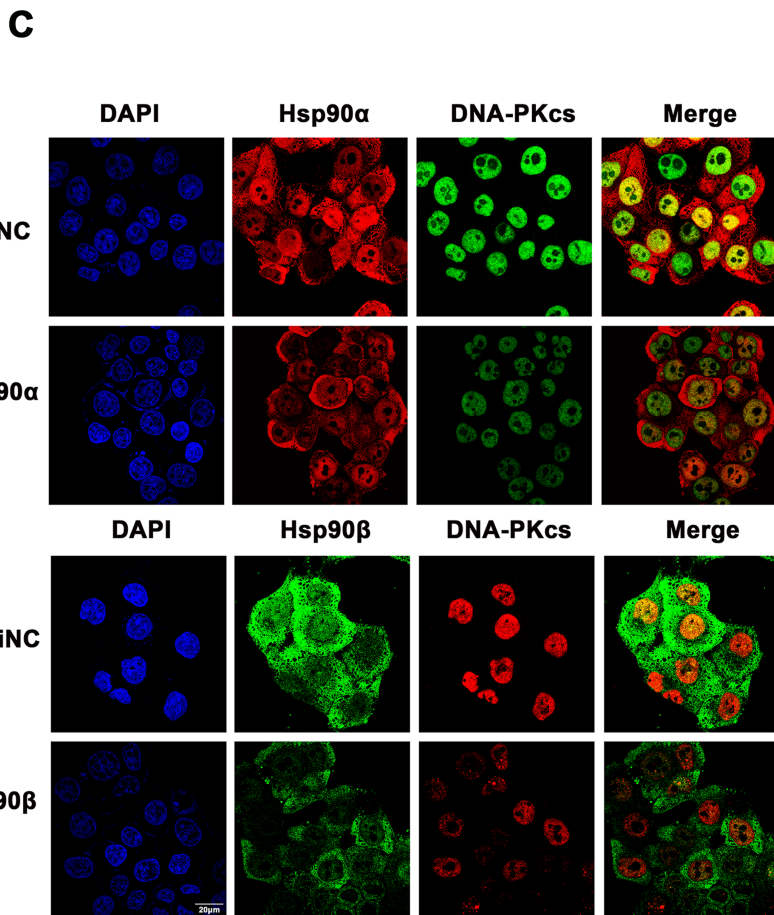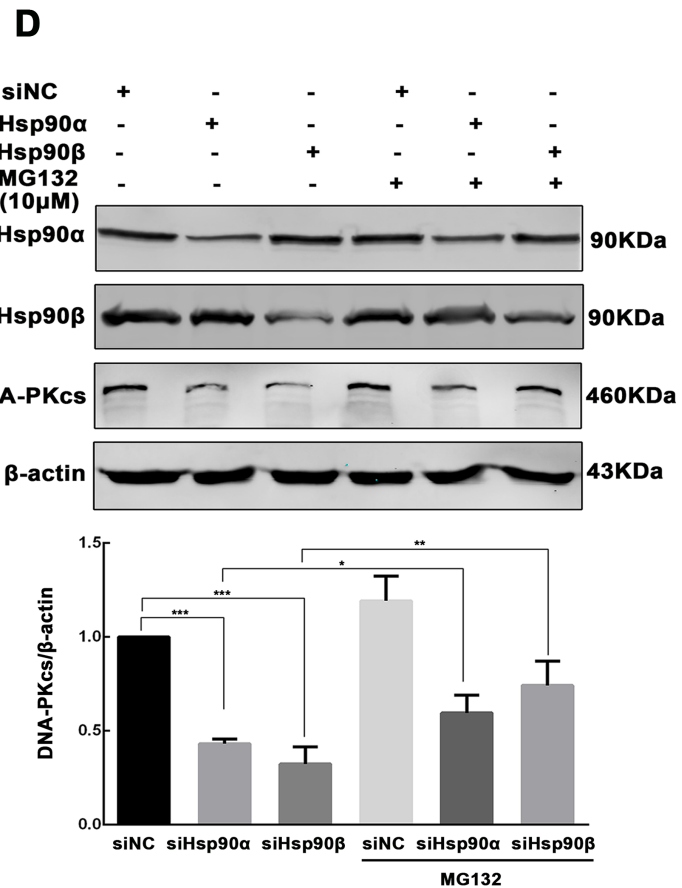

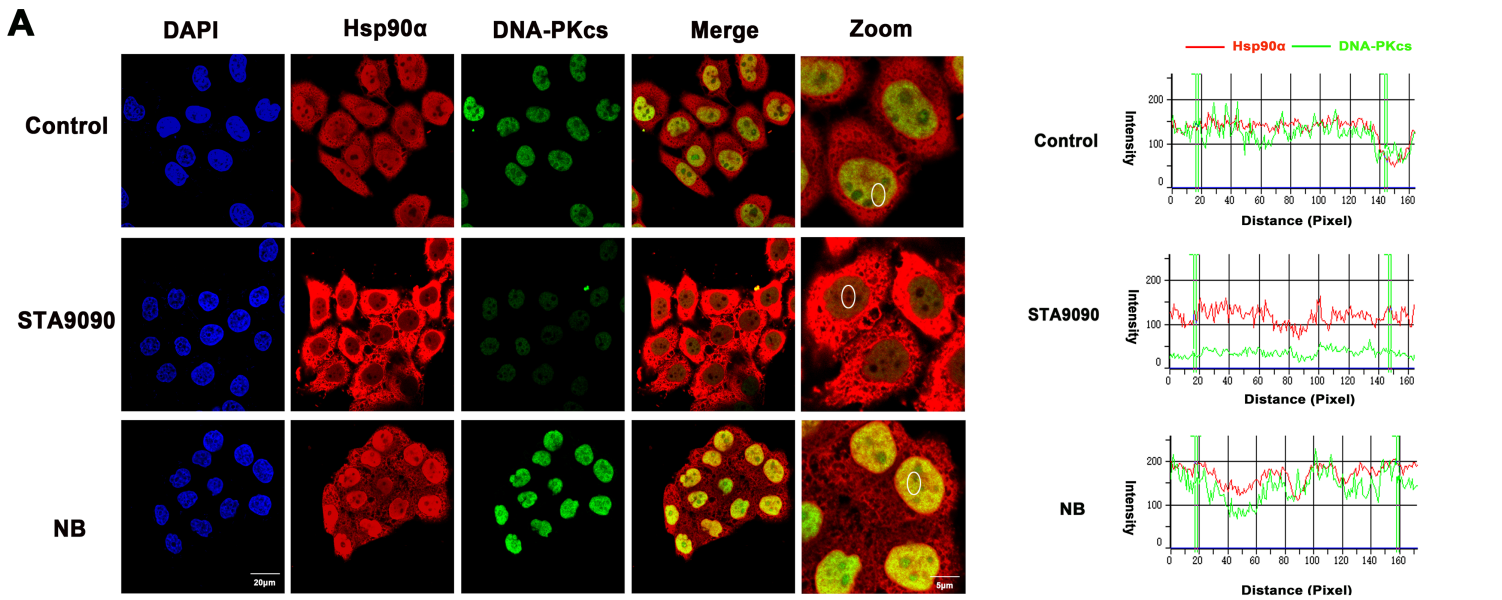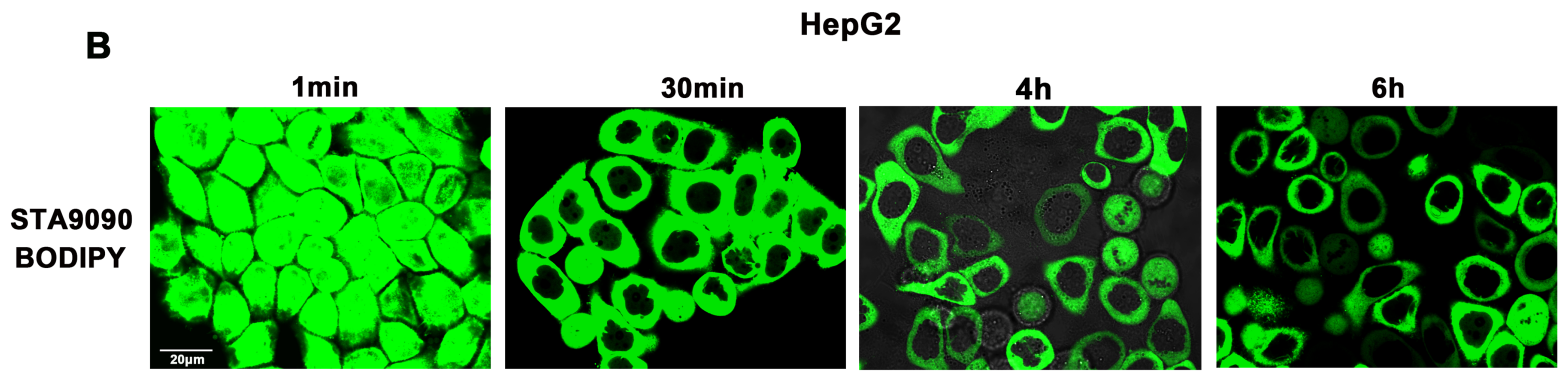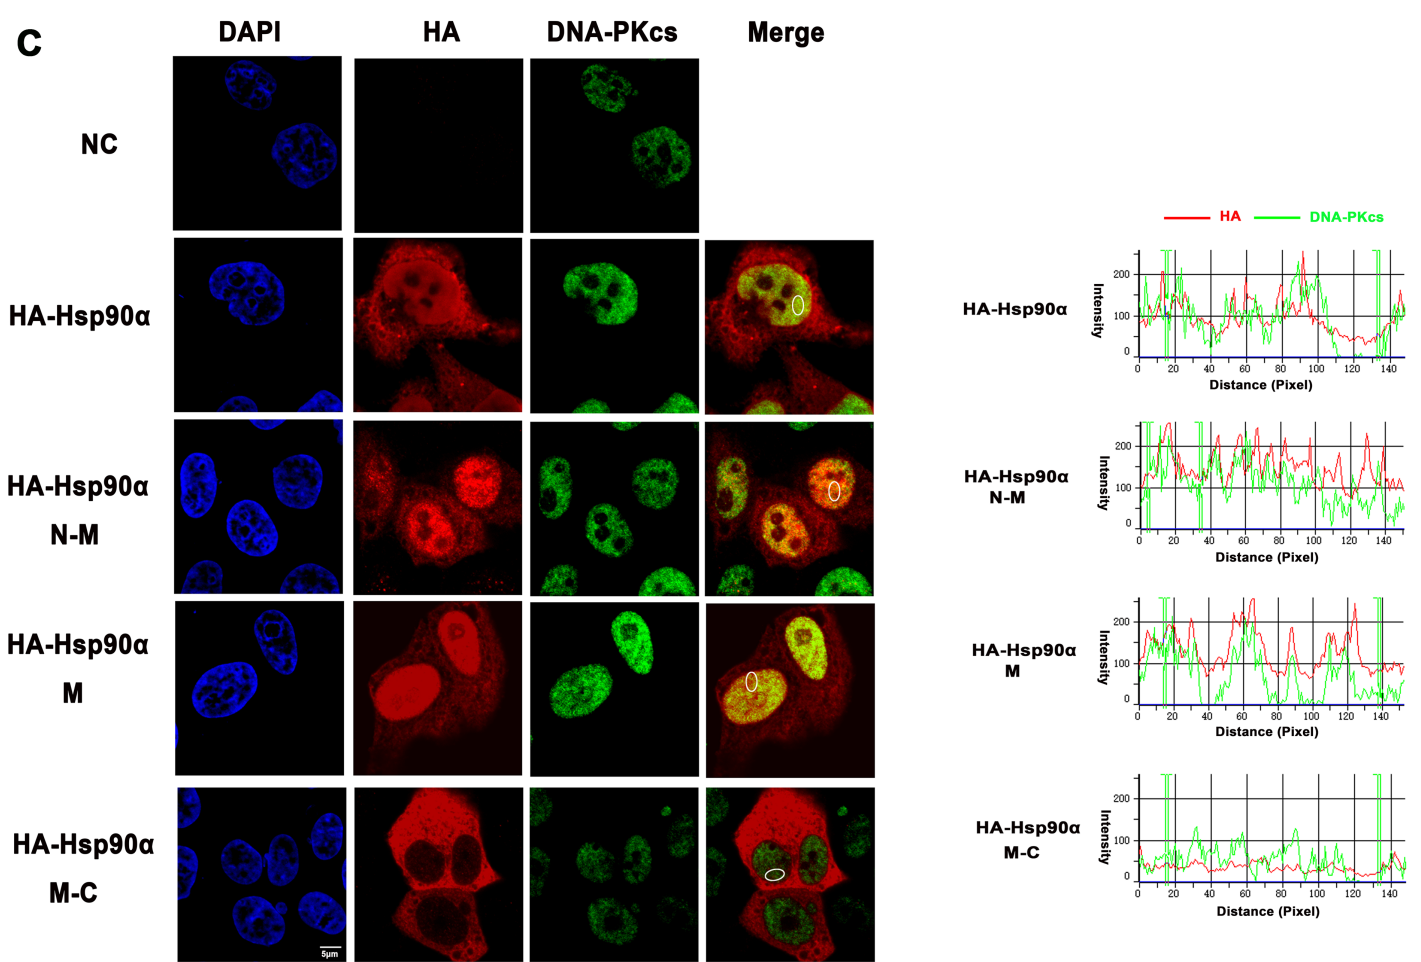



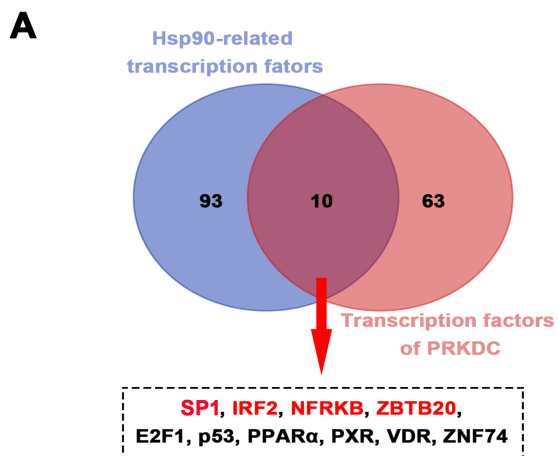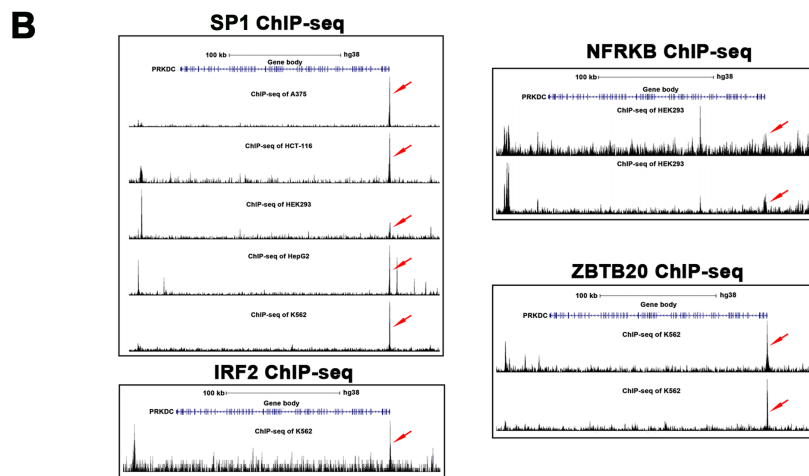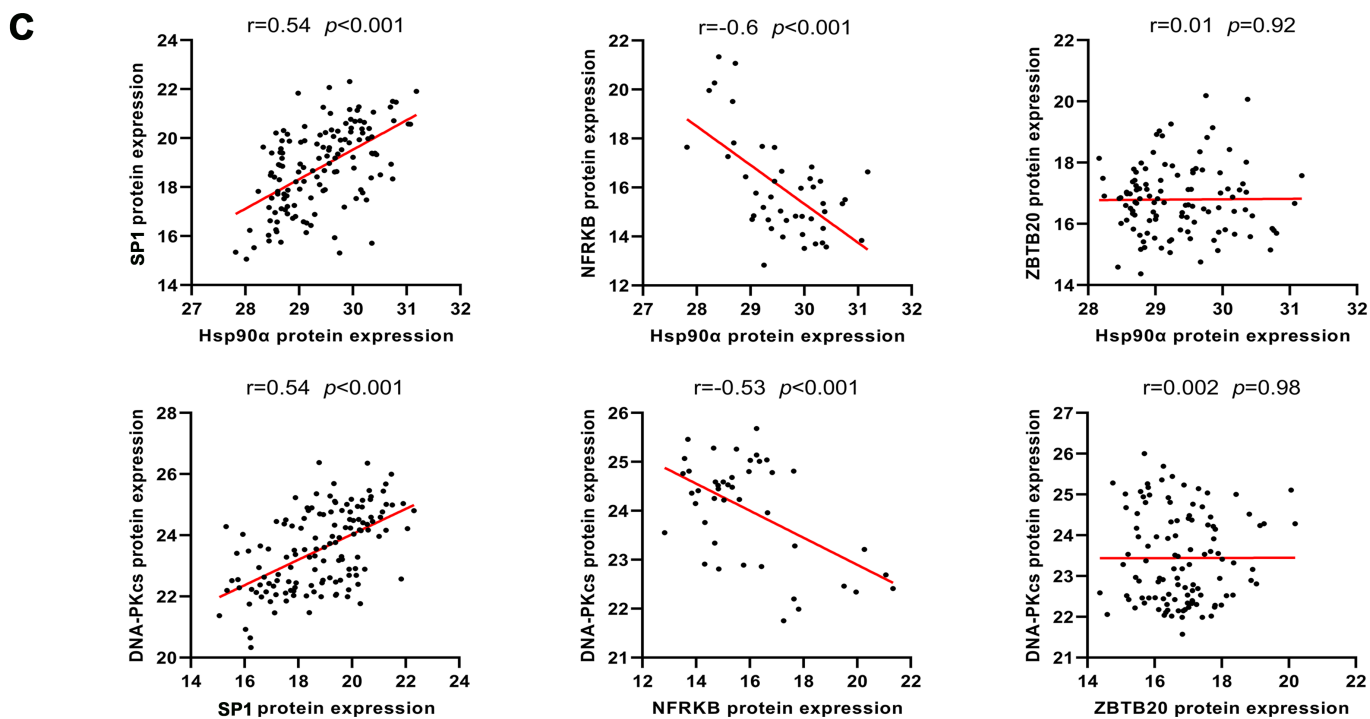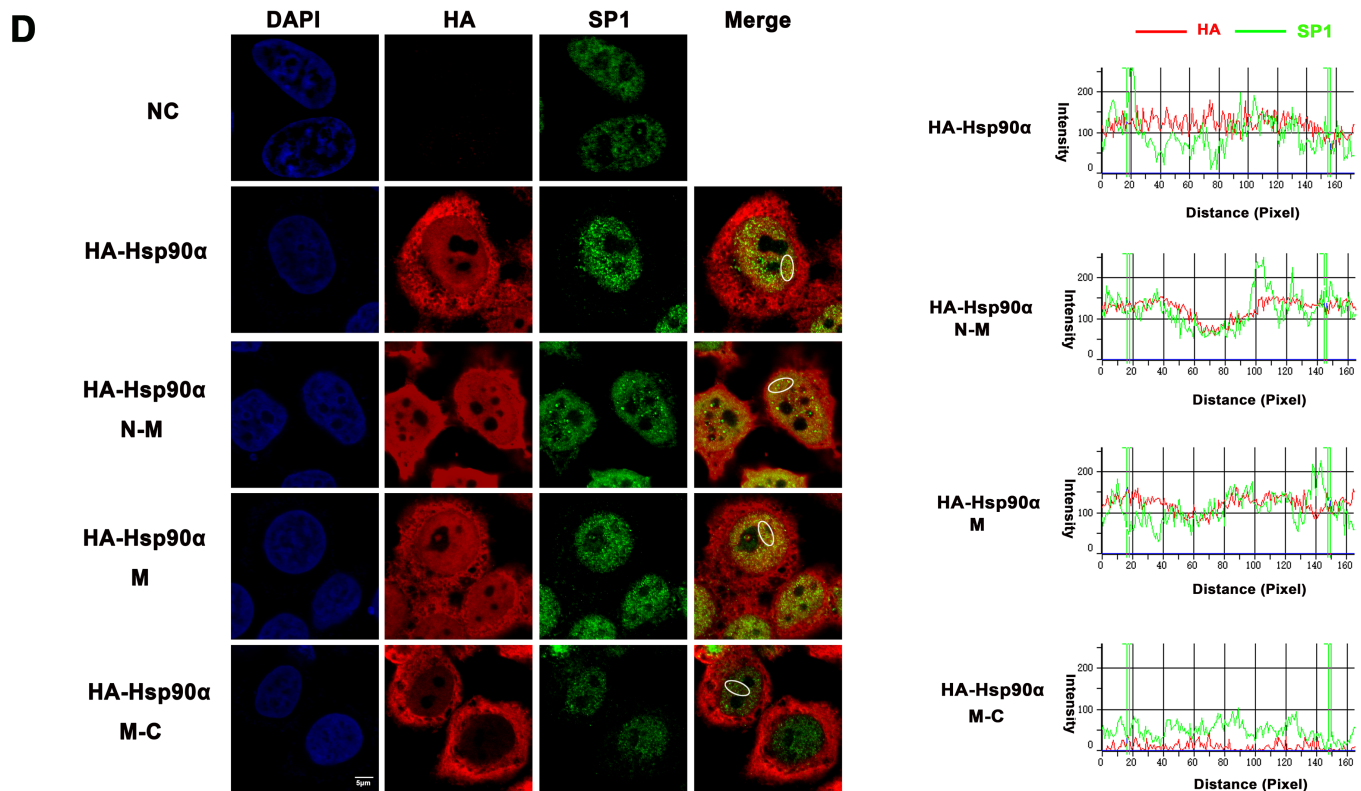

Figure S6

**A**

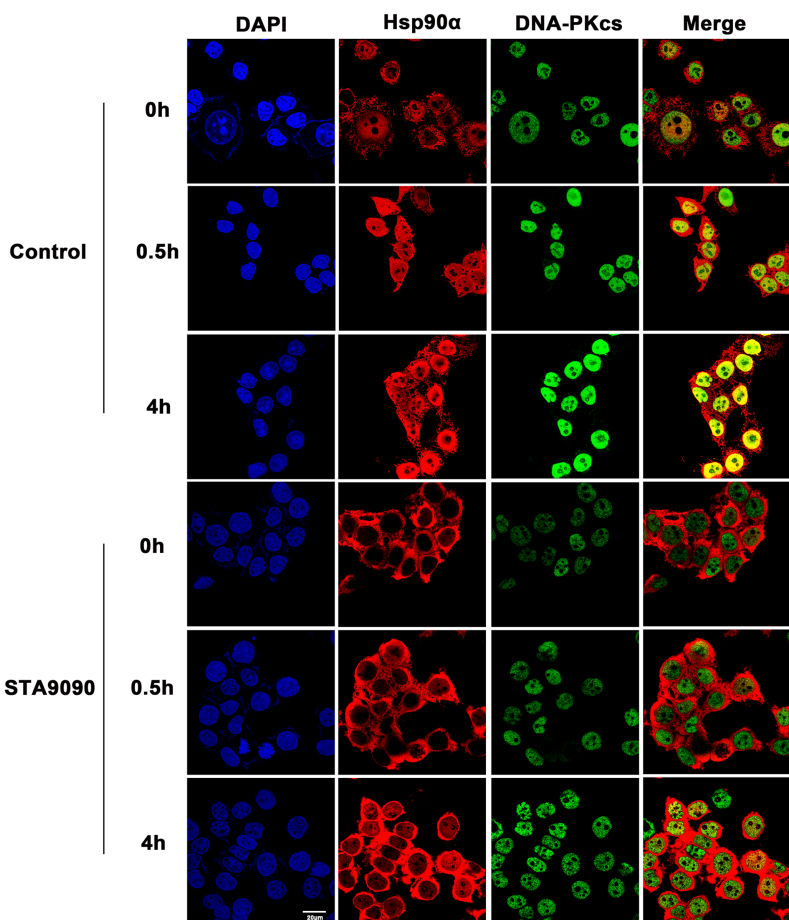

**B**

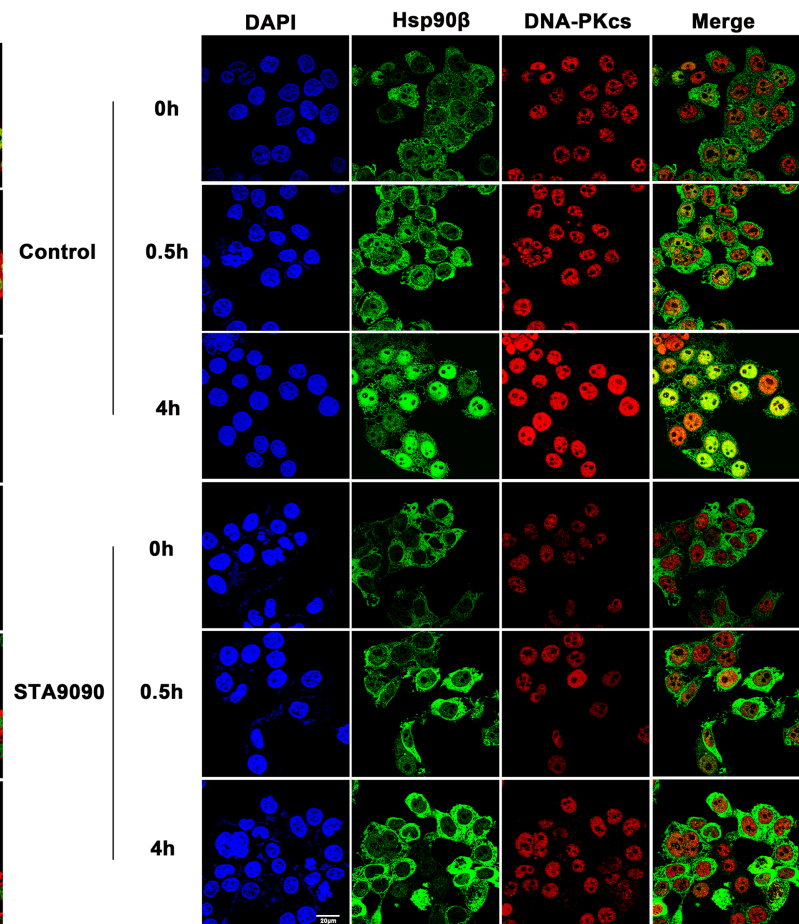

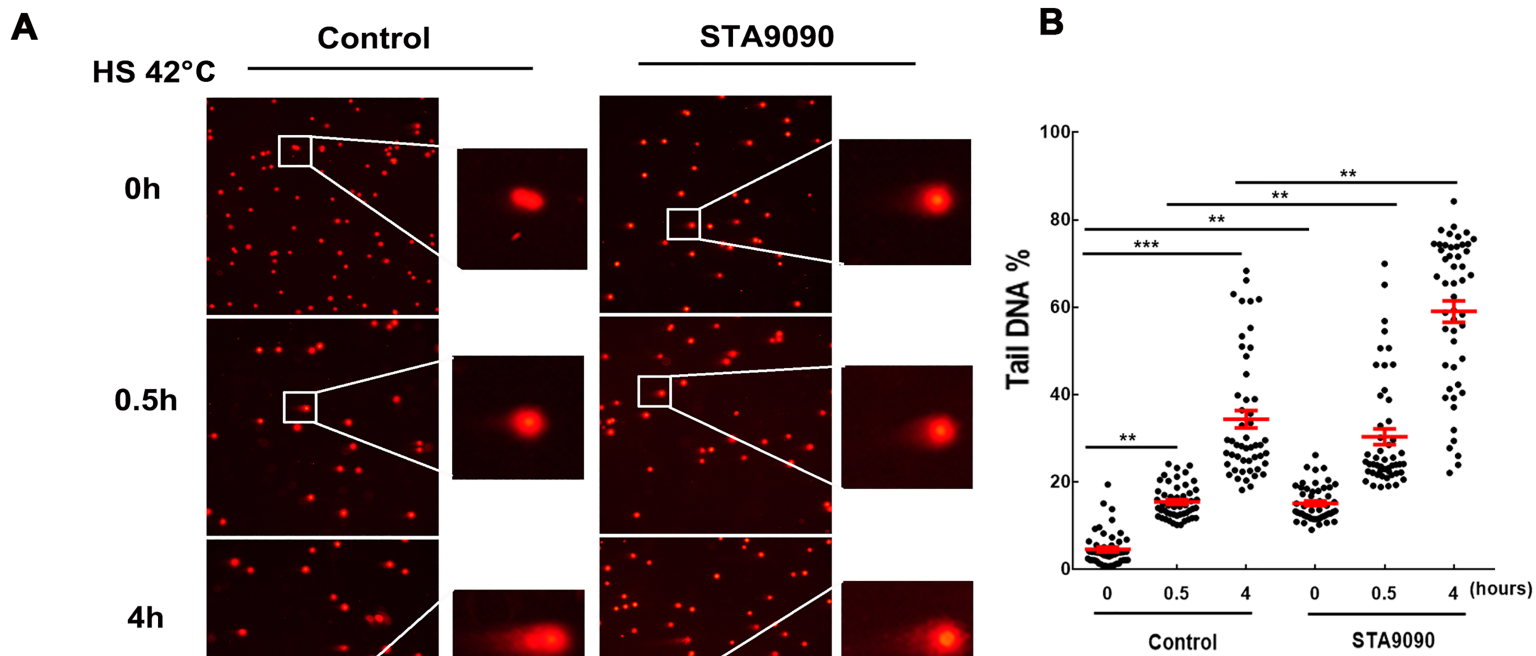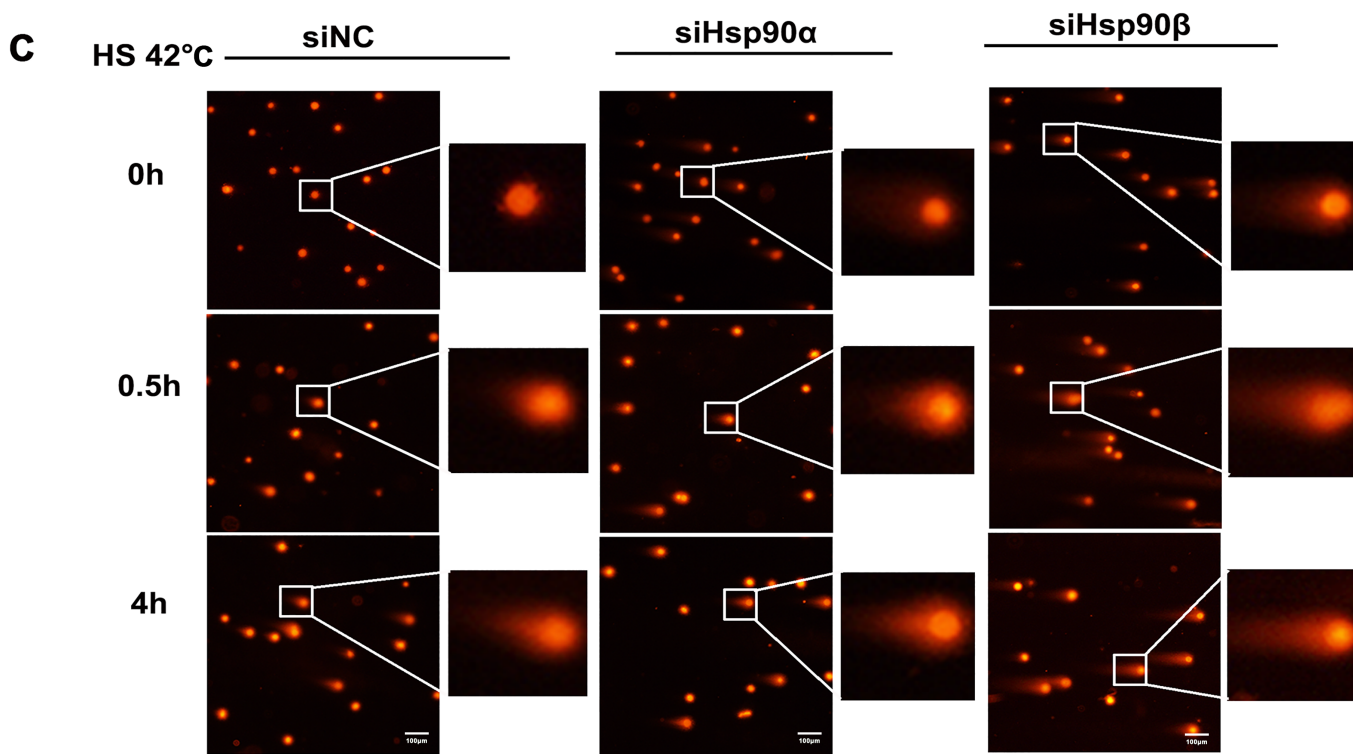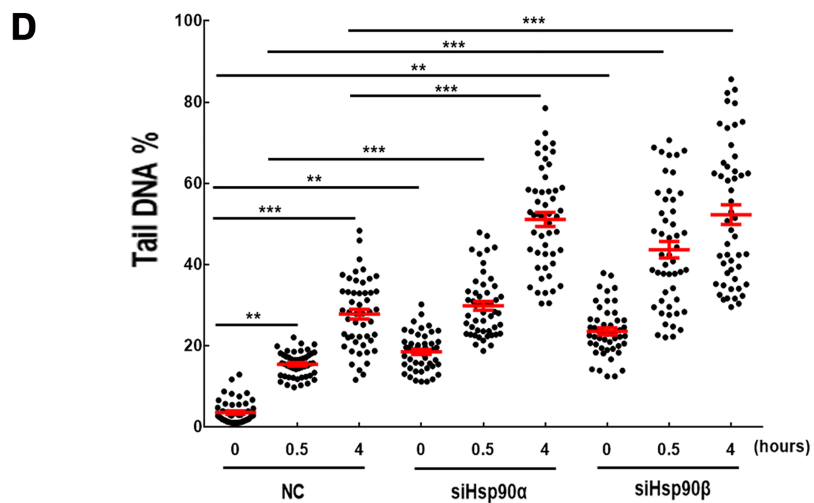

Supplement: NIHMS1731489-supplement-2.pdf [file NIHMS1731489-supplement-2.pdf]
